# Supplementary material for: Near infrared fluorescent biliproteins generated from bacteriophytochrome AphB of Nostoc sp. PCC 7120
Source: Royal Society of Chemistry journal article supplement (doi:10.1039/c5pp00442j), 2016-03-11
Supplement: c5pp00442j1.pdf [file c5pp00442j1.pdf]

**Near infrared fluorescent biliproteins generated from bacteriophytochrome AphB of  
*Nostoc* sp. PCC 7120**

**Supplement**

Che Yuan<sup>1</sup>, Hui-Zhen Li<sup>1</sup>, Kun Tang<sup>1,2</sup>, Wolfgang Gärtner<sup>2</sup>, Hugo Scheer<sup>3</sup>, Ming Zhou<sup>1,\*</sup>,  
Kai-Hong Zhao<sup>1,\*</sup>

- 1 State Key Laboratory of Agricultural Microbiology, Huazhong Agricultural University, Wuhan 430070, P.R. China
- 2 Max-Planck-Institute for Chemical Energy Conversion, Stiftstrasse 34-36, D-45470 Mülheim, Germany
- 3 Department Biologie I, Universität München, D-80638 München, Germany

**Supplementary material**

(1 figures, 4 tables)

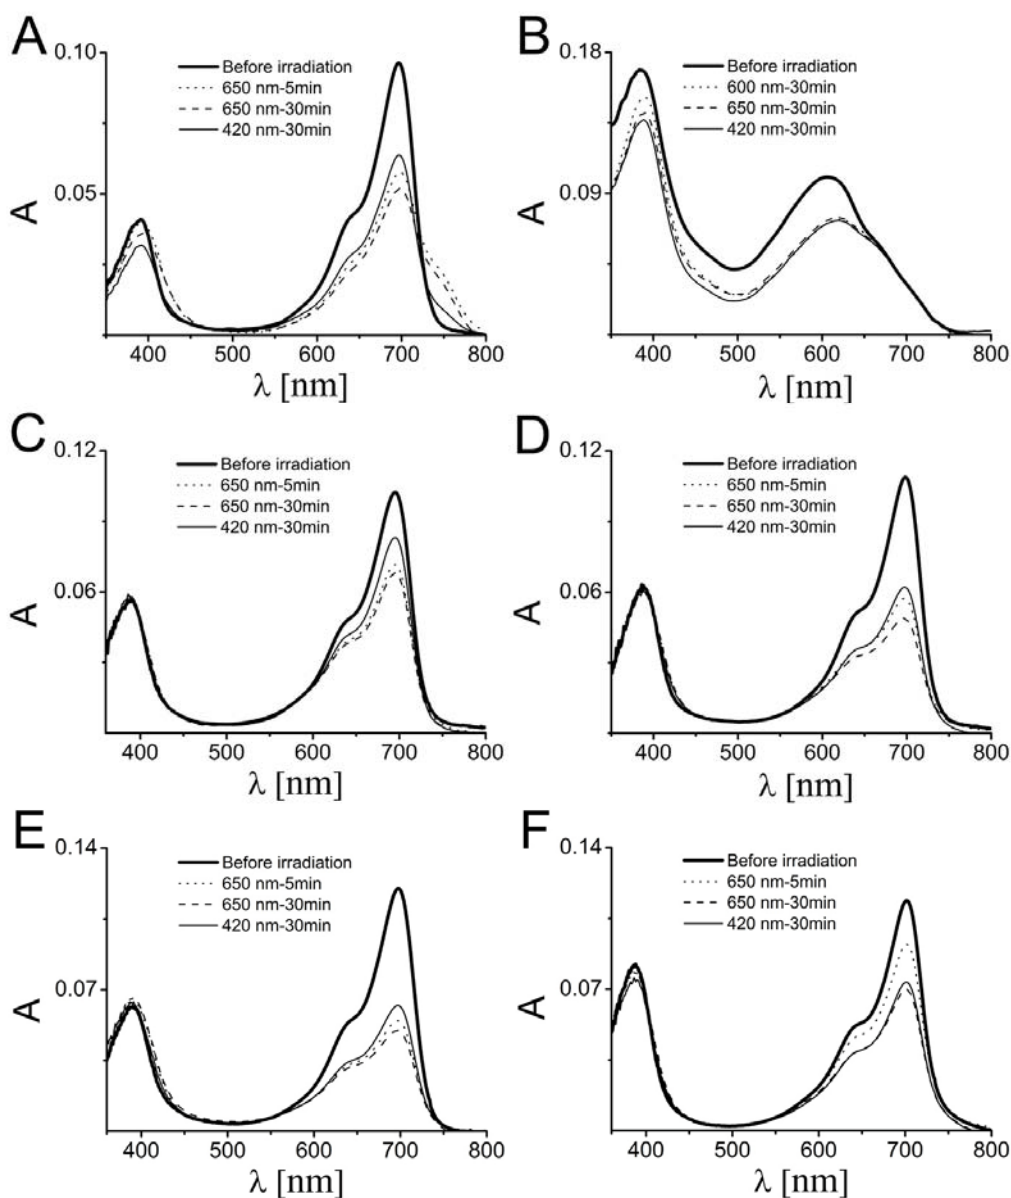

**Fig. S1: Photochemistry of PAS-GAF variants.** (A): BV-PAS-GAF-1, (B): BV-PAS-GAF-64, (C): BV-PAS-GAF-36, (D): BV-PAS-GAF-52, (E): BV-PAS-GAF-53, and (F): BV-PAS-GAF-60 (see Table S1). After recording the spectrum of each sample *as isolated*, its photochemistry was generally realized by an irradiation cycle of 650-420 nm, with the irradiation times specified in the inset. The 2<sup>nd</sup> irradiation at 650 nm for 30 min has been carried out to ensure saturating conditions (see materials and methods). In the case of PAS-GAF-64, an additional irradiation has been carried out at 600 nm in order to check the photoactivity of the component with an absorption band in the 600 nm range.

**Table S1: Primers for site-directed variants.**

| Primer | Sequence                                         | DNA               |
|--------|--------------------------------------------------|-------------------|
| P1     | 5'- CTAGATCTGGTGAACATCAACGATATCACTA -3'          | <i>pas-gaf-1</i>  |
| P2     | 5'- ACTAAGCTTAATCTTCTTTGGCACTCATTT -3'           |                   |
| P3     | 5'- ACCGTTCCACAACAAGCTAGAAAACCTC -3'             | <i>pas-gaf-29</i> |
| P4     | 5'- GCTAGCTGGATAATTTAACCCCTAAATAAGATGTAAGA -3'   |                   |
| P5     | 5'- ACTATTCCACAACAAGCTAGAAAACCTCTATAG -3'        | <i>pas-gaf-36</i> |
| P6     | 5'- GCTAGCTGGATAATTTAACCCCTAAATAAGATGTAAGA -3'   |                   |
| P7     | 5'- GCTATTCCACAACAAGCTAGAAAACCTCTATAGCC -3'      | <i>pas-gaf-52</i> |
| P8     | 5'- GCTAGCTGGATAATTTAACCCCTAAATAAGATGTAAGATA -3' |                   |
| P9     | 5'- GCTATTCCACAACAAGCTAGAAAACCTCTATAGCC -3'      | <i>pas-gaf-53</i> |
| P10    | 5'- GCTAGCTGGATAATTTAACCCCTAAATAAGATG -3'        |                   |
| P11    | 5'- TTTATTCCACAACAAGCTAGAAAACCTCTATAG -3'        | <i>pas-gaf-55</i> |
| P12    | 5'- GCTAGCTGGATAATTTAACCCCTAAATAAGATGTAAGA -3'   |                   |
| P13    | 5'- ACACCAAATATATACCCTATGAAATAC -3'              | <i>pas-gaf-56</i> |
| P14    | 5'- TTGATGATGGCACAATGAGTCC -3'                   |                   |
| P15    | 5'- GGTATTCCACAACAAGCTAGAAAACCTCTATAG -3'        | <i>pas-gaf-60</i> |
| P16    | 5'- GCTAGCTGGATAATTTAACCCCTAAATAAGATGTAAGA -3'   |                   |
| P17    | 5'- TTCTCCCCATTACACATTGAATATATGCAGAA-3           | <i>pas-gaf-41</i> |
| P18    | 5'- GCTGCGAAGAAGCTGAGCGACTTAAATC -3              |                   |
| P19    | 5'- TATTATATACCCTATGAAATACGGAGCGCCTG -3'         | <i>pas-gaf-57</i> |
| P20    | 5'- TGGTGATTGATGATGGCAGGCAATG -3'                |                   |
| P21    | 5'- CATATTCCACAACAAGCTAGAAAACCTCTATAGCC -3       | <i>pas-gaf-58</i> |
| P22    | 5'- GCTAGCTGGATAATTTAACCCCTAAATAAGATGTAAGATA -3  |                   |
| P23    | 5'- TGTTCAACCAAATATATACCCTATGAAATAC -3'          | <i>pas-gaf-61</i> |
| P24    | 5'- ATGATGGCAGGCAATGAGTCCATAA -3'                |                   |
| P25    | 5'- CCTGCCATCATCACAATGACTTCTGTAGAAATG -3         | <i>pas-gaf-62</i> |

P26 5'- CACAGGCGCTCCGTATTTTCATAGG -3'

P27 5'- ACGCGGATCCACTATTCCCTTTCAGGTAGACC -3'

P28 5'- ACCGCTCGAGTTAATCTTCTTTGGCACTCATT -3'

For random

mutations

---

**Table S2: AphB(1-321) (i.e. PAS-GAF of AphB) variants.** (a) site-directed mutations. (b) the unique H260Y variant and its ancestor. Following the parental protein, PAS-GAF-1 (= WT AphB(1-321)), the various multiple mutants are numbered and listed in order of decaying fluorescence quantum yield (see Table S3).

| <b>PAS-GAF</b>     | <b>Sequence variations</b>                                                                  |
|--------------------|---------------------------------------------------------------------------------------------|
| <b>Variant no.</b> |                                                                                             |
| 1                  | AphB(1-321)                                                                                 |
| 2                  | AphB(7-321/E74V/Q89R/N92D/L139R/D207T/I208V/Y263F/T270A/A288V/I301T)                        |
| 3                  | AphB(7-321/L37F/S100T/L139H/D207T/I208V/Y263F/N266S/I287V/A288V)                            |
| 4                  | AphB(7-321/E74V/I90S/N116D/L139H/D207T/I208V/Y263F/M278V)                                   |
| 5                  | AphB(7-321/T51P/E74V/L139H/D207T/I208V/I234V/Y263F/A288V)                                   |
| 6                  | AphB(7-321/E74V/L139H/Q181L/D207T/I208V/Y263F/A288V)                                        |
| 7                  | AphB(7-321/S132P/K166R/D207T/I208V/Y263F/A288V)                                             |
| 8                  | AphB(7-321/V36A/E74A/L126S/K129E/V140A/V190I/K191R/D207T/I208V/Y263F/A288V/T312A)           |
| 9                  | AphB(7-321/E74V/K80E/L139H/M144V/L145P/D207T/I208V/Y263F/A288V)                             |
| 10                 | AphB(7-321/E74V/L139H/K141R/I159V/S206N/D207T/I208V/Y263F/A288V)                            |
| 11                 | AphB(7-321/L37F/V47G/E74V/L142P/K146R/V173A/D207T/I208V/Q211R/L215P/Y263H/A288V)            |
| 12                 | AphB(7-321/E74V/K80E/F133S/L139H/K141R/D207T/I208V/Y263F/A288V)                             |
| 13                 | AphB(7-321/I28V/E74V/L139H/L142P/D207T/I208V/Y263F/A288V)                                   |
| 14                 | AphB(7-321/E74V/D207T/I208V/Y263F/A288V)                                                    |
| 15                 | AphB(7-321/E74V/L139H/S157N/D207T/I208V/Q210R/Y263F/A288V/P294S/Q310R/T312A)                |
| 16                 | AphB(7-321/E74V/H112Q/L139H/D207T/I208V/Y263F/A288V/I297M)                                  |
| 17                 | AphB(7-321/E74V/L139H/D207T/I208V/S249G/Y263F/A288V)                                        |
| 18                 | AphB(7-321/E74V/D108E/L139H/D207T/I208V/Y263F/A288V)                                        |
| 19                 | AphB(7-321/E74V/E103G/L139H/D207T/I208V/I224T/Y263F/A288V)                                  |
| 20                 | AphB(7-321/F52L/F72G/I91T/E95A/N102S/K129T/F134L/I156S/M174A/D207T/I208V/Y263F/A288V/F307L) |

- 21 AphB(7-321/E74V/S100P/H131Q/L139H/D207T/I208V/Q210R/Y263F/A288V)
- 22 AphB(7-321/E74V/L139H/K146R/I159M/D207T/I208V/Q244R/Y263F/A288V)
- 23 AphB(7-321/S106G/L139H/S206G/D207T/I208V/Y263F/K282E/A288V/T312A)
- 24 AphB(7-321/E74V/L139H/D207T/I208V/Y263F/A288V)
- 25 AphB(7-321/E74V/L139H/D207T/I208V/M264L/A288V)
- 26 AphB(7-321/F134L/D207T/I208V/A288V)
- 27 AphB(7-321/Y137F/A151V/D207T/I208V/V256F/I261L/A288V/S293T)
- 28 AphB(7-321/S114P/D207T/I208V/V256F/A288V/S293T)
- 29<sup>a</sup> AphB(7-321/D207T/I208V/A288V)
- 30 AphB(7-321/L14V/V36A/E74V/F136S/D207T/I208V/A288V)
- 31 AphB(7-321/E74V/F96L/F136I/D207T/I208V/A288V)
- 32 AphB(7-321/L142P/E193G/D207T/I208V/V256F/A288V/S293T/I297M/T312A)
- 33 AphB(7-321/D207T/I208V/V256F/A288V/S293T)
- 34 AphB(7-321/E74V/D207T/I208V/Y263H/A288V)
- 35 AphB(7-321/L126S/Q162R/D207T/I208V/S276P/A288V)
- 36<sup>a</sup> AphB(7-321/D207T/A288V)
- 37<sup>b</sup> AphB(7-321/E74V/D207H/I208T/Y263F/A288V)
- 38 AphB(7-321/E74V/L139H/D207T/I208V/M264L/A288V)
- 39 AphB(7-321/E74V/S127L/D207T/I208V/A288V)
- 40 AphB(7-321/Q61R/L126S/S132L/D207T/I208V/A288V)
- 41<sup>a</sup> AphB(7-321/D207A/V256F/A288V)
- 42 AphB(7-321/E74V/Y137F/A151V/D207T/I208V/V256F/I261L/K281R/A288V/S293T)
- 43 AphB(7-321/E74V/C82W/I105T/K129R/L139R/D207T/I208V/L259S/Y263F/A288V)
- 44 AphB(7-321/D207A/V256F/A288V/E306A)
- 45 AphB(7-321/E74V/L195M/T196Q/D207H/I208T/Y216H/Y263F/A288V)
- 46 AphB(7-321/S15C/E74V/L139H/D207T/I208V/Y263F/A288V)
- 47 AphB(7-321/E74V/D207T/I208V/A288V)
- 48 AphB(7-321/P59S/H101Y/A111V/D128G/D207A/A288V/K295R)
- 49 AphB(7-321/N115D/K129E/F136V/H138L/L139R/I187M/D207A/A288V)

- 50 AphB(7-321H138L/L139R/D207A/A288V)
- 51 AphB(7-321/I90F/T130A/H138L/L139R/N183I/D207A/A288V)
- 52<sup>a</sup> AphB(7-321/D207A/A288V)
- 53<sup>a</sup> AphB(7-321/D207H/A288V)
- 54 AphB(7-321/F136L/D207A/L221Q/A288V/K295T)
- 55<sup>a</sup> AphB(7-321/D207F/A288V)
- 56<sup>a</sup> AphB(7-321/D207A/S293T)
- 57<sup>a</sup> AphB(7-321/D207H/K295Y)
- 58<sup>a</sup> AphB(7-321/D207H)
- 59 AphB(7-321/E86G/L126S/F136L/D207A/L221Q/K228N/N280D/A288V/K295T)
- 60<sup>a</sup> AphB(7-321/D207G/A288V)
- 61<sup>a</sup> AphB(7-321/D207H/Q292C)
- 62<sup>a</sup> AphB(7-321/D207A/A288V/E306A)
- 63 AphB(7-321/E74V/D207W/I208T/Y263F/A288V)
- 64<sup>b</sup> AphB(7-321/E74V/D207H/I208T/H260Y/Y263F/A288V)
- 65 AphB(7-321/E74V/D207T/I208V/Y263W/A288V)
-

**Table S3: Quantitative absorption and fluorescence data of near infrared fluorescent biliproteins derived from PAS-GAF of AphB.** Spectra in KPB (20 mM, pH 7.0) containing 0.5 M NaCl were obtained after purification by Ni<sup>2+</sup> affinity chromatography. Unless otherwise stated, the fluorescence spectra were obtained under excitation at 600 nm. Transients were fitted with a bi-exponential sequential model. (a) site-directed mutations. (b) the unique H260Y variant and its ancestor. (c) fluorescence emission spectrum obtained under excitation at 640 nm. (d) brightness of the BV-variants relative to that of wt BV-PAS-GAF-1 ( $\epsilon \cdot \Phi_{fl} = 1.5 \text{ mM}^{-1} \text{ cm}^{-1}$ ).

| BV-PAS-GAF<br>Variant no. | Absorption               |                                                                 |                          | Fluorescence |                         |                                     |                                                        |
|---------------------------|--------------------------|-----------------------------------------------------------------|--------------------------|--------------|-------------------------|-------------------------------------|--------------------------------------------------------|
|                           | $\lambda_{\max}$<br>[nm] | $\epsilon \cdot 10^{-4}$<br>[M <sup>-1</sup> cm <sup>-1</sup> ] | $\lambda_{\max}$<br>[nm] | $\Phi_{fl}$  | Stokes<br>shift<br>[nm] | Bright-<br>ness <sup>d</sup><br>[%] | Life time [ns]<br>$\tau_1$ (%), $\tau_2$ (%); $\chi^2$ |
| 1                         | 697                      | 6.4                                                             | 721                      | 0.023        | 24                      | 100                                 | 0.48(97.7), 3.0(2.3); 1.86                             |
| 2                         | 693                      | 8.1                                                             | 717                      | 0.060        | 24                      | 330                                 | 0.62(98.1), 4.0(1.9); 1.94                             |
| 3                         | 691                      | 7.7                                                             | 717                      | 0.060        | 26                      | 314                                 | 0.61(97.6), 3.4(2.4); 1.81                             |
| 4                         | 693                      | 8.1                                                             | 717                      | 0.059        | 24                      | 325                                 | 0.62(98.2), 3.9(1.8); 2.11                             |
| 5                         | 693                      | 7.9                                                             | 717                      | 0.057        | 24                      | 306                                 | 0.61(98.0), 3.7(2.0); 1.84                             |
| 6                         | 693                      | 8.0                                                             | 718                      | 0.057        | 25                      | 310                                 | 0.61(97.6), 3.3(2.4); 2.15                             |
| 7                         | 693                      | 8.0                                                             | 717                      | 0.057        | 24                      | 310                                 | 0.61(98.1), 4.1(1.9); 1.82                             |
| 8                         | 693                      | 7.9                                                             | 718                      | 0.057        | 25                      | 306                                 | 0.60(98.1), 4.1(1.9); 1.86                             |
| 9                         | 693                      | 8.4                                                             | 717                      | 0.057        | 24                      | 326                                 | 0.61(97.8), 3.4(2.2); 2.00                             |
| 10                        | 694                      | 8.1                                                             | 718                      | 0.057        | 24                      | 314                                 | 0.60(97.8), 3.6(2.2); 1.84                             |
| 11                        | 693                      | 7.9                                                             | 717                      | 0.056        | 24                      | 301                                 | 0.59(97.9), 3.6(2.1); 1.85                             |
| 12                        | 693                      | 7.9                                                             | 717                      | 0.056        | 24                      | 301                                 | 0.62(98.1), 3.8(1.9); 2.00                             |
| 13                        | 693                      | 8.1                                                             | 716                      | 0.056        | 23                      | 308                                 | 0.61(97.8), 3.5(2.2); 2.16                             |
| 14                        | 693                      | 8.2                                                             | 718                      | 0.056        | 25                      | 312                                 | 0.60(98.6), 5.4(1.4); 1.83                             |
| 15                        | 693                      | 8.6                                                             | 718                      | 0.055        | 25                      | 321                                 | 0.60(97.8), 3.4(2.2); 2.05                             |
| 16                        | 693                      | 9.2                                                             | 718                      | 0.055        | 25                      | 344                                 | 0.60(97.4), 3.2(2.6); 1.61                             |



|                 |     |     |     |       |    |     |                            |
|-----------------|-----|-----|-----|-------|----|-----|----------------------------|
| 17              | 693 | 7.7 | 718 | 0.055 | 25 | 288 | 0.60(98.1), 3.9(1.9); 2.02 |
| 18              | 693 | 8.4 | 717 | 0.054 | 24 | 308 | 0.61(97.7), 3.2(2.3); 1.67 |
| 19              | 692 | 7.7 | 718 | 0.054 | 26 | 283 | 0.59(97.3), 3.0(2.7); 1.56 |
| 20              | 695 | 9.6 | 718 | 0.053 | 23 | 346 | 0.61(98.0), 3.6(2.0); 2.02 |
| 21              | 693 | 8.7 | 717 | 0.053 | 24 | 314 | 0.61(98.3), 4.2(1.7); 1.63 |
| 22              | 693 | 8.4 | 717 | 0.052 | 24 | 297 | 0.61(98.1), 4.1(1.9); 1.92 |
| 23              | 695 | 7.4 | 719 | 0.052 | 24 | 262 | 0.58(98.0), 4.0(2.0); 1.90 |
| 24              | 693 | 8.9 | 718 | 0.051 | 25 | 308 | 0.61(97.0), 3.0(3.0); 1.58 |
| 25              | 694 | 7.4 | 719 | 0.051 | 25 | 257 | 0.58(98.1), 3.7(1.9); 2.17 |
| 26              | 694 | 7.4 | 718 | 0.051 | 24 | 257 | 0.56(98.2), 4.4(1.8); 1.94 |
| 27              | 694 | 7.3 | 719 | 0.050 | 25 | 248 | 0.55(98.4), 5.6(1.6); 1.83 |
| 28              | 692 | 7.2 | 718 | 0.050 | 26 | 245 | 0.55(98.7), 5.9(1.3); 1.76 |
| 29 <sup>a</sup> | 694 | 7.0 | 718 | 0.050 | 24 | 238 | 0.57(98.0), 4.1(2.0); 1.65 |
| 30              | 694 | 7.3 | 718 | 0.050 | 24 | 248 | 0.56(98.7), 6.0(1.3); 1.75 |
| 31              | 694 | 7.6 | 719 | 0.050 | 25 | 258 | 0.56(98.7), 6.3(1.3); 1.80 |
| 32              | 693 | 7.5 | 717 | 0.049 | 24 | 250 | 0.54(98.7), 5.8(1.3); 1.81 |
| 33              | 693 | 7.3 | 719 | 0.049 | 26 | 243 | 0.54(98.7), 5.4(1.3); 1.75 |
| 34              | 693 | 6.9 | 720 | 0.049 | 27 | 230 | 0.59(95.8), 2.4(4.2); 1.71 |
| 35              | 694 | 7.2 | 719 | 0.049 | 25 | 240 | 0.55(98.6), 5.4(1.4); 1.80 |
| 36 <sup>a</sup> | 695 | 7.0 | 719 | 0.049 | 24 | 233 | 0.59(98.0), 4.1(2.0); 1.51 |
| 37 <sup>b</sup> | 693 | 7.0 | 719 | 0.048 | 26 | 228 | 0.59(97.6), 3.6(2.4); 1.70 |
| 38              | 694 | 6.7 | 719 | 0.048 | 25 | 219 | 0.57(98.6), 5.5(1.4); 1.73 |
| 39              | 694 | 7.3 | 719 | 0.048 | 25 | 238 | 0.56(98.6), 5.5(1.4); 1.78 |
| 40              | 694 | 7.6 | 718 | 0.048 | 24 | 248 | 0.58(98.5), 5.0(1.5); 1.48 |
| 41 <sup>a</sup> | 697 | 7.0 | 721 | 0.048 | 24 | 228 | 0.53(98.2), 4.5(1.8); 1.70 |
| 42              | 694 | 7.4 | 719 | 0.048 | 25 | 242 | 0.57(98.1), 3.9(1.9); 1.60 |
| 43              | 692 | 8.7 | 717 | 0.047 | 25 | 278 | 0.57(97.2), 3.4(2.8); 2.06 |
| 44              | 696 | 7.0 | 720 | 0.047 | 24 | 224 | 0.53(98.4), 4.7(1.6); 1.81 |
| 45              | 692 | 7.2 | 719 | 0.047 | 27 | 230 | 0.60(97.8), 3.9(2.2); 1.67 |

|                   |             |     |             |       |    |     |                            |
|-------------------|-------------|-----|-------------|-------|----|-----|----------------------------|
| 46                | 693         | 9.2 | 717         | 0.047 | 24 | 294 | 0.57(96.0), 2.5(4.0); 2.34 |
| 47                | 694         | 7.3 | 720         | 0.047 | 26 | 233 | 0.55(98.7), 6.3(1.3); 1.72 |
| 48                | 698         | 8.3 | 721         | 0.046 | 23 | 260 | 0.55(98.7), 5.9(1.3); 1.77 |
| 49                | 699         | 8.3 | 721         | 0.046 | 22 | 260 | 0.54(98.6), 5.8(1.4); 1.70 |
| 50                | 698         | 6.8 | 722         | 0.045 | 24 | 208 | 0.54(97.7), 5.1(2.3); 1.86 |
| 51                | 700         | 7.9 | 722         | 0.045 | 22 | 242 | 0.52(98.2), 4.4(1.8); 1.83 |
| 52 <sup>a</sup>   | 698         | 7.6 | 722         | 0.045 | 24 | 232 | 0.55(98.0), 4.0(2.0); 1.56 |
| 53 <sup>a</sup>   | 698         | 7.2 | 722         | 0.044 | 24 | 215 | 0.56(98.0), 5.8(2.0); 1.62 |
| 54                | 698         | 7.9 | 720         | 0.044 | 22 | 236 | 0.52(98.4), 1.1(1.6); 1.81 |
| 55 <sup>a</sup>   | 699         | 6.2 | 723         | 0.043 | 24 | 181 | 0.58(97.5), 6.8(2.5); 1.69 |
| 56 <sup>a</sup>   | 700         | 7.2 | 723         | 0.042 | 23 | 206 | 0.56(98.4), 4.4(1.6); 1.48 |
| 57 <sup>a</sup>   | 699         | 7.3 | 722         | 0.042 | 23 | 208 | 0.54(98.5), 5.4(1.5); 1.75 |
| 58 <sup>a</sup>   | 699         | 6.4 | 722         | 0.041 | 23 | 178 | 0.54(98.1), 5.2(1.9); 1.89 |
| 59                | 697         | 7.0 | 720         | 0.041 | 23 | 195 | 0.57(97.8), 3.6(2.2); 2.15 |
| 60 <sup>a</sup>   | 701         | 6.4 | 723         | 0.040 | 22 | 174 | 0.54(98.2), 4.8(1.8); 1.69 |
| 61 <sup>a</sup>   | 699         | 6.5 | 722         | 0.039 | 23 | 172 | 0.54(98.4), 5.9(1.6); 1.73 |
| 62 <sup>a</sup>   | 697         | 6.7 | 722         | 0.039 | 25 | 178 | 0.53(98.0), 3.4(2.0); 1.81 |
| 63                | 689         | 6.2 | 717         | 0.036 | 28 | 152 | 0.46(94.6), 1.8(5.4); 1.97 |
| 64 <sup>b</sup>   | 606/<br>692 | 2.2 | 648/7<br>12 | 0.031 | 20 | 46  | 0.27(96.7), 8.4(3.3); 2.28 |
| 65                | 703         | 7.1 | 724         | 0.025 | 21 | 121 | 0.36(94.2), 1.3(5.8); 1.94 |
| 64 <sup>b,c</sup> | 606/<br>692 | 2.2 | 718         | 0.017 | 26 | 25  | 0.27(96.8), 9.1(3.2); 2.39 |

---

**Table S4: Plasmids used.** The pET30 and pACYCDuet, from Novagen, are T7 promoter expression vectors. pACYCDuet is designed to co-express two target proteins in *E. coli*. Using the two vector-derivatives together with compatible replicons and antibiotic resistance, 3 proteins could be co-expressed in the same cell, thereby generating the respective BV-variants in *E. coli*.

| Antibiotic<br>resistance | Plasmids with P15A replicon | Plasmids with ColE1 replicon                                                                                                                                                                                                                                                                                                                                                                                                                                                                                                                                                                                                                         |
|--------------------------|-----------------------------|------------------------------------------------------------------------------------------------------------------------------------------------------------------------------------------------------------------------------------------------------------------------------------------------------------------------------------------------------------------------------------------------------------------------------------------------------------------------------------------------------------------------------------------------------------------------------------------------------------------------------------------------------|
|                          | pACYCDuet derivatives       | pET30 derivatives                                                                                                                                                                                                                                                                                                                                                                                                                                                                                                                                                                                                                                    |
| Kanamycin                |                             | <p>pET-<i>pas-gaf-1</i></p> <p>pET-<i>pas-gaf-2</i></p> <p>pET-<i>pas-gaf-3</i></p> <p>pET-<i>pas-gaf-4</i></p> <p>pET-<i>pas-gaf-5</i></p> <p>pET-<i>pas-gaf-6</i></p> <p>pET-<i>pas-gaf-7</i></p> <p>pET-<i>pas-gaf-8</i></p> <p>pET-<i>pas-gaf-9</i></p> <p>pET-<i>pas-gaf-10</i></p> <p>pET-<i>pas-gaf-11</i></p> <p>pET-<i>pas-gaf-12</i></p> <p>pET-<i>pas-gaf-13</i></p> <p>pET-<i>pas-gaf-14</i></p> <p>pET-<i>pas-gaf-15</i></p> <p>pET-<i>pas-gaf-16</i></p> <p>pET-<i>pas-gaf-17</i></p> <p>pET-<i>pas-gaf-18</i></p> <p>pET-<i>pas-gaf-19</i></p> <p>pET-<i>pas-gaf-20</i></p> <p>pET-<i>pas-gaf-21</i></p> <p>pET-<i>pas-gaf-22</i></p> |

|  |  |                                                                                                                                                                                                                                                                                                                                                                                                                                                                                                                                                                                                                                                                                                                                                                                                                                                                          |
|--|--|--------------------------------------------------------------------------------------------------------------------------------------------------------------------------------------------------------------------------------------------------------------------------------------------------------------------------------------------------------------------------------------------------------------------------------------------------------------------------------------------------------------------------------------------------------------------------------------------------------------------------------------------------------------------------------------------------------------------------------------------------------------------------------------------------------------------------------------------------------------------------|
|  |  | <p>pET-<i>pas-gaf-23</i></p> <p>pET-<i>pas-gaf-24</i></p> <p>pET-<i>pas-gaf-25</i></p> <p>pET-<i>pas-gaf-26</i></p> <p>pET-<i>pas-gaf-27</i></p> <p>pET-<i>pas-gaf-28</i></p> <p>pET-<i>pas-gaf-29</i></p> <p>pET-<i>pas-gaf-30</i></p> <p>pET-<i>pas-gaf-31</i></p> <p>pET-<i>pas-gaf-32</i></p> <p>pET-<i>pas-gaf-33</i></p> <p>pET-<i>pas-gaf-34</i></p> <p>pET-<i>pas-gaf-35</i></p> <p>pET-<i>pas-gaf-36</i></p> <p>pET-<i>pas-gaf-37</i></p> <p>pET-<i>pas-gaf-38</i></p> <p>pET-<i>pas-gaf-39</i></p> <p>pET-<i>pas-gaf-40</i></p> <p>pET-<i>pas-gaf-41</i></p> <p>pET-<i>pas-gaf-42</i></p> <p>pET-<i>pas-gaf-43</i></p> <p>pET-<i>pas-gaf-44</i></p> <p>pET-<i>pas-gaf-45</i></p> <p>pET-<i>pas-gaf-46</i></p> <p>pET-<i>pas-gaf-47</i></p> <p>pET-<i>pas-gaf-48</i></p> <p>pET-<i>pas-gaf-49</i></p> <p>pET-<i>pas-gaf-50</i></p> <p>pET-<i>pas-gaf-51</i></p> |
|--|--|--------------------------------------------------------------------------------------------------------------------------------------------------------------------------------------------------------------------------------------------------------------------------------------------------------------------------------------------------------------------------------------------------------------------------------------------------------------------------------------------------------------------------------------------------------------------------------------------------------------------------------------------------------------------------------------------------------------------------------------------------------------------------------------------------------------------------------------------------------------------------|

|                 |                   |                                                                                                                                                                                                                                                                                                                                                                                                                       |
|-----------------|-------------------|-----------------------------------------------------------------------------------------------------------------------------------------------------------------------------------------------------------------------------------------------------------------------------------------------------------------------------------------------------------------------------------------------------------------------|
|                 |                   | <p>pET-<i>pas-gaf-52</i></p> <p>pET-<i>pas-gaf-53</i></p> <p>pET-<i>pas-gaf-54</i></p> <p>pET-<i>pas-gaf-55</i></p> <p>pET-<i>pas-gaf-56</i></p> <p>pET-<i>pas-gaf-57</i></p> <p>pET-<i>pas-gaf-58</i></p> <p>pET-<i>pas-gaf-59</i></p> <p>pET-<i>pas-gaf-60</i></p> <p>pET-<i>pas-gaf-61</i></p> <p>pET-<i>pas-gaf-62</i></p> <p>pET-<i>pas-gaf-63</i></p> <p>pET-<i>pas-gaf-64</i></p> <p>pET-<i>pas-gaf-65</i></p> |
| Chloramphenicol | pACYC- <i>ho1</i> |                                                                                                                                                                                                                                                                                                                                                                                                                       |
